# Supplementary material for: DeAnnCNV: a tool for online detection and annotation of copy number variations from whole-exome sequencing data
Source: PubMed Central journal article supplement (PMC4489280; doi:10.1093/nar/gkv556), 2015-05-26
Supplement: supp_gkv556_nar-00361-web-b-2015-File005.pdf [file supp_gkv556_nar-00361-web-b-2015-File005.pdf]

## Supplementary Material

# DeAnnCNV: a tool for online detection and annotation of copy number variations from whole-exome sequencing data

Yuanwei Zhang<sup>1\*</sup>, Zhenhua Yu<sup>2\*</sup>, Rongjun Ban<sup>2\*</sup>, Huan Zhang<sup>1\*</sup>, Furhan Iqbal<sup>1,3</sup>, Ao Li<sup>2,4†</sup>, and Qinghua Shi<sup>1†</sup>

<sup>1</sup>Molecular and Cell Genetics Laboratory, The CAS Key Laboratory of Innate Immunity and Chronic Disease, Hefei National Laboratory for Physical Sciences at Microscale and School of Life Sciences, University of Science and Technology of China, Hefei 230027, China. <sup>2</sup>School of Information Science and Technology, University of Science and Technology of China, Hefei 230027, China. <sup>3</sup>Institute of Pure and Applied Biology, Bahauddin Zakariya University Multan, 60800, Pakistan. <sup>4</sup>Research Centers for Biomedical Engineering, University of Science and Technology of China, Hefei 230027, China.

\*These authors contributed equally to this manuscript.

†To whom correspondence should be addressed.

## 1. Supplementary Methods

### Hidden Markov model

The hidden states of the HMM is depicted in Table S1. Each hidden state corresponds to one type of the CNVs ranging from 0 to 7 copies. Copy number of each exon is represented by the LCR of the exon as defined in the main text. We assume that LCR is Student's t-distributed with the emission probability under each hidden state defined as:

$$p(l_i | c, \sigma, \nu, o) = \frac{\Gamma((\nu+1)/2)}{\Gamma(\nu/2)\sqrt{\pi\nu\sigma}} \left(1 + \frac{1}{\nu} \left(\frac{l_i - \mu_c}{\sigma}\right)^2\right)^{-\frac{\nu+1}{2}} \quad (1)$$

where  $\nu$  is the number of degrees of freedom and  $\Gamma$  is the gamma function.  $\mu_c$  is the mean value of the LCR signals under hidden state  $c$  and defined as:

$$\mu_c = \log 2(y_c / 2) + o \quad (2)$$

Parameter  $o$  is introduced to account for possible baseline shift of the LCR signals, and  $y_c$  denotes the copy number associated with hidden state  $c$ .

We adopted expectation maximization (EM) algorithm (1) to learn the HMM and estimate model parameters. In the expectation step of the EM algorithm, expectation of the partial log-likelihood function of LCR signals was formulated as:

$$E(LL_l = \sum_{i=1}^N \sum_{c=1}^C \gamma_{i,c} \log(p(l_i | c, \sigma, \nu, o))) \quad (4)$$

Forward-backward algorithm (2) was employed to calculate the posterior probability  $\gamma_{i,c}$  that the  $i$ th exon is in hidden state  $c$ . In the maximization step, all parameters were updated by using Newton–Raphson method. The parameter updating procedure was performed iteratively until the EM algorithm converges. Once the training procedure was finished, copy number of each exon was inferred from the hidden state associated with the largest posterior probability. At the same time, segmentation of all exons based on the copy numbers was performed to output CNVs for each sample.

### Reliability score

It is necessary to provide a measurement for users to evaluate the reliability of DeAnnCNV results. Based on the segmentation results, we defined a reliability score for each segment as follows:

$$Score_i = mean \left( \frac{p(l_{ij} | c, \sigma, \nu, o)}{p(\hat{l}_{ij} | c, \sigma, \nu, o)} \right) \quad (5)$$

where  $l_{ij}$  is the LCR value of the  $j$ th exon in the  $i$ th segment and  $\hat{l}_{ij}$  is the expected LCR value in state  $c$ . Furthermore, the scores for all segments along the whole genome were scaled to 0~100.

### Simulated datasets

We simulated ten samples to examine the CNV detection performance of DeAnnCNV. Sequencing data from a real normal sample was used to generate the simulated samples with each sample containing a distinct complement of CNVs as illustrated in Table S4-Table S13. The CNVs presented in each sample range from one to twenty copies, and the size ranges from 500kb to 4.5Mb. We generated the sequencing data of each simulated sample by following two steps: 1) for a given region with copy number of  $C$ , reads mapped to the

region were randomly and repeatedly sampled from the real normal BAF file, the total number of reads sampled from the region is  $N \cdot C/2$ , where  $N$  is number of reads aligned within the region of the real normal sample; 2) reads from different regions were merged and processed to generate BAM files by using SAMtools (3).

## Performance evaluation

All the CNV calls of exons predefined in simulation experiment were used as the golden standard to evaluate the ability of DeAnnCNV in detecting CNVs. For evaluation of CNV detection performance, exons with CNV (copy number  $\neq 2$ ) were treated as positives, and copy neutral (copy number = 2) exons were treated as negatives. For each sample, true positives (TP) are defined as positive exons that are correctly detected as positives by DeAnnCNV, true negatives (TN) are defined as negative exons that are correctly detected as negatives, false positives (FP) are defined as negative exons that are wrongly detected as positives, and false negatives (FN) are defined as positive exons that are wrongly detected as negatives. Three performance measurements, precision, recall and F-measure, are employed to evaluate the CNV detection performance of DeAnnCNV, which are defined as follows:

$$precision = \frac{TP}{TP + NP} \quad (7)$$

$$recall = \frac{TP}{TP + FN} \quad (8)$$

$$Fmeasure = \frac{2 \times precision \times recall}{precision + recall} \quad (9)$$

Furthermore, the real normal sample that used to generate the simulated samples was used as the common reference to call CNVs on the simulated samples.

## 2. Supplementary Figure

Figure S1. Screening for potential disease-causing CNVs according to the detected and annotated results provided by DeAnnCNV server.

**A**

Two screenshots of the DeAnnCNV server interface. The left screenshot shows a list of CNV-associated results with a red box highlighting "All CNVs detected by DeAnnCNV". The right screenshot shows the same list with a red box highlighting "Sort by loss" and an arrow pointing to the "loss" column.

**B**

After searching "infertility" in "ClinVar" column, no infertility-associated variations have been reported by ClinVar yet.

Searching "infertility" in "MGI-KO" results in two CNVs carried by two patients with the same associated gene PABPN1L.

KO Information for Gene Symbol *PABPN1L*

Symbol: *PABPN1L*  
Description: male infertility, inability of male to produce live offspring.  
PMID: [\[link\]](#)

KO mice of the associated gene - PABPN1L are infertile.

mRNA Expression

PABPN1L mRNA expression in human tissue

| Tissue          | Expression Level |
|-----------------|------------------|
| uterus          | 0.0              |
| urinary bladder | 0.0              |
| thyroid gland   | 0.0              |
| testis          | 0.1              |
| stomach         | 0.0              |
| spleen          | 0.2              |
| small intestine | 0.0              |
| skin            | 0.0              |
| salivary gland  | 0.1              |
| prostate        | 0.1              |
| placenta        | 0.0              |
| pancreas        | 0.0              |
| ovary           | 0.0              |
| lymph node      | 0.1              |
| lung            | 0.0              |
| liver           | 0.1              |
| kidney          | 0.0              |
| heart muscle    | 0.0              |
| gallbladder     | 0.1              |
| esophagus       | 0.0              |
| duodenum        | 0.0              |
| colon           | 0.0              |
| cerebral cortex | 0.0              |
| bone marrow     | 0.0              |
| appendix        | 0.0              |
| adrenal gland   | 0.4              |
| adipose tissue  | 0.1              |

PABPN1L are also found expressed in human testis.

### 3. Supplementary Tables

Table S1. The hidden states of the HMM in DeAnnCNV.

| State | Copy number | CNV type |
|-------|-------------|----------|
| 1     | 0           | Loss     |
| 2     | 1           | Loss     |
| 3     | 2           | Neutral  |
| 4     | 3           | Gain     |
| 5     | 4           | Gain     |
| 6     | 5           | Gain     |
| 7     | 6           | Gain     |
| 8     | 7           | Gain     |

Table S2. Precision, recall and F-measure of DeAnnCNV for 10 simulated samples.

| Samples | Measurements |        |           |
|---------|--------------|--------|-----------|
|         | Precision    | Recall | F-measure |
| s1      | 0.99         | 0.98   | 0.99      |
| s2      | 0.99         | 0.98   | 0.99      |
| s3      | 0.99         | 0.96   | 0.98      |
| s4      | 0.99         | 0.98   | 0.99      |
| s5      | 0.99         | 0.99   | 0.99      |
| s6      | 0.99         | 0.95   | 0.97      |
| s7      | 0.99         | 0.92   | 0.96      |
| s8      | 1            | 0.99   | 0.99      |
| s9      | 0.99         | 0.96   | 0.97      |
| s10     | 0.98         | 0.98   | 0.98      |

Table S3. Confusion matrix.

| Copy number | 0 | 1         | 2   | 3         | 4         | 5          | 6         | 7         |
|-------------|---|-----------|-----|-----------|-----------|------------|-----------|-----------|
| 1           | 0 | 7101(99%) | 67  | 0         | 0         | 0          | 0         | 0         |
| 3           | 0 | 1         | 206 | 5033(96%) | 0         | 0          | 0         | 0         |
| 4           | 0 | 0         | 25  | 0         | 850 (97%) | 0          | 0         | 0         |
| 5           | 0 | 0         | 252 | 0         | 0         | 6956 (96%) | 4         | 0         |
| 6           | 0 | 0         | 112 | 0         | 0         | 5          | 3284(97%) | 0         |
| 7           | 0 | 0         | 284 | 0         | 0         | 0          | 5         | 4490(94%) |
| 15          | 0 | 0         | 44  | 0         | 0         | 0          | 0         | 2119(98%) |
| 20          | 0 | 0         | 8   | 0         | 0         | 0          | 0         | 602(99%)  |

The number of exons was counted for different copy numbers.

Table S4. Simulated CNVs for sample s1.

| Region id | Chromosome | Start position | End position | Copy number |
|-----------|------------|----------------|--------------|-------------|
| 1         | 1          | 23895345       | 24395375     | 20          |
| 2         | 1          | 45570376       | 47070376     | 15          |
| 3         | 6          | 30790713       | 33290743     | 7           |
| 4         | 9          | 107420007      | 110920007    | 6           |
| 5         | 11         | 62405040       | 66905040     | 5           |
| 6         | 5          | 43574748       | 44074778     | 4           |
| 7         | 15         | 43009890       | 44509920     | 3           |
| 8         | 3          | 52529380       | 55029410     | 3           |
| 9         | 4          | 70108573       | 73608603     | 1           |
| 10        | 1          | 160817636      | 165317666    | 1           |

Table S5. Simulated CNVs for sample s2.

| Region id | Chromosome | Start position | End position | Copy number |
|-----------|------------|----------------|--------------|-------------|
| 1         | 14         | 70581527       | 71081557     | 20          |
| 2         | 21         | 43310046       | 44810076     | 15          |
| 3         | 11         | 63790121       | 66290151     | 7           |
| 4         | 2          | 42326089       | 45826119     | 6           |
| 5         | 14         | 91124034       | 95624064     | 5           |
| 6         | 18         | 12496426       | 12996456     | 4           |
| 7         | 16         | 20241656       | 21741686     | 3           |
| 8         | 6          | 33380656       | 35880686     | 3           |
| 9         | 13         | 25332273       | 28832303     | 1           |
| 10        | 12         | 50165804       | 54665834     | 1           |

Table S6. Simulated CNVs for sample s3.

| Region id | Chromosome | Start position | End position | Copy number |
|-----------|------------|----------------|--------------|-------------|
| 1         | 14         | 70278730       | 70778760     | 20          |
| 2         | 18         | 20000452       | 21500482     | 15          |
| 3         | 15         | 41500439       | 44000469     | 7           |
| 4         | 3          | 30004587       | 33504617     | 6           |
| 5         | 5          | 140003491      | 144503521    | 5           |
| 6         | 20         | 31122650       | 31622680     | 4           |
| 7         | 21         | 32000409       | 34500439     | 3           |
| 8         | 8          | 22221310       | 25721340     | 3           |
| 9         | 21         | 43357034       | 44857109     | 1           |
| 10        | 4          | 80012733       | 84512763     | 1           |

Table S7. Simulated CNVs for sample s4.

| Region id | Chromosome | Start position | End position | Copy number |
|-----------|------------|----------------|--------------|-------------|
| 1         | 3          | 44374646       | 44874676     | 20          |
| 2         | 3          | 50070768       | 51570798     | 15          |
| 3         | 4          | 41759677       | 44259707     | 7           |
| 4         | 17         | 35015654       | 37515684     | 6           |
| 5         | 19         | 15236125       | 19736155     | 5           |
| 6         | 11         | 20585547       | 21085567     | 4           |
| 7         | 22         | 28526889       | 30026919     | 3           |
| 8         | 8          | 30072488       | 32572518     | 3           |
| 9         | 7          | 34690604       | 38190634     | 1           |
| 10        | 14         | 50440730       | 54940760     | 1           |

Table S8. Simulated CNVs for sample s5.

| Region id | Chromosome | Start position | End position | Copy number |
|-----------|------------|----------------|--------------|-------------|
| 1         | 7          | 34840468       | 35340498     | 20          |
| 2         | 10         | 33582894       | 35082924     | 15          |
| 3         | 10         | 70167539       | 72667569     | 7           |
| 4         | 17         | 17865129       | 21365159     | 6           |
| 5         | 17         | 24802608       | 28302638     | 5           |
| 6         | 16         | 70128031       | 70628061     | 4           |
| 7         | 13         | 46405345       | 47905375     | 3           |
| 8         | 13         | 51907354       | 54407445     | 3           |
| 9         | 5          | 80010434       | 83512180     | 1           |
| 10        | 6          | 50848276       | 55348306     | 1           |

Table S9. Simulated CNVs for sample s6.

| Region id | Chromosome | Start position | End position | Copy number |
|-----------|------------|----------------|--------------|-------------|
| 1         | 13         | 30093814       | 30593844     | 20          |
| 2         | 21         | 44044784       | 45544814     | 15          |
| 3         | 9          | 90875870       | 93375900     | 7           |
| 4         | 7          | 44768967       | 48268997     | 6           |
| 5         | 15         | 40022515       | 44522545     | 5           |
| 6         | 15         | 53761770       | 54261800     | 4           |
| 7         | 4          | 80079159       | 81579189     | 3           |
| 8         | 6          | 30735153       | 33239652     | 3           |
| 9         | 17         | 23115065       | 26615095     | 1           |
| 10        | 11         | 64383907       | 68883937     | 1           |

Table S10. Simulated CNVs for sample s7.

| Region id | Chromosome | Start position | End position | Copy number |
|-----------|------------|----------------|--------------|-------------|
| 1         | 22         | 32897257       | 33397287     | 20          |
| 2         | 18         | 20302781       | 21802711     | 15          |
| 3         | 15         | 40249134       | 42749164     | 7           |
| 4         | 21         | 42702542       | 46202572     | 6           |
| 5         | 16         | 21180027       | 25680057     | 5           |
| 6         | 16         | 70217593       | 70717623     | 4           |
| 7         | 4          | 84599855       | 86099885     | 3           |
| 8         | 14         | 60573480       | 63073510     | 3           |
| 9         | 9          | 90279775       | 93779805     | 1           |
| 10        | 1          | 63562373       | 68062403     | 1           |



Table S11. Simulated CNVs for sample s8.

| Region id | Chromosome | Start position | End position | Copy number |
|-----------|------------|----------------|--------------|-------------|
| 1         | 22         | 30880177       | 31380207     | 20          |
| 2         | 22         | 37028735       | 38528765     | 15          |
| 3         | 4          | 84601245       | 87101275     | 7           |
| 4         | 1          | 60103373       | 63613403     | 6           |
| 5         | 17         | 20347743       | 24847773     | 5           |
| 6         | 6          | 90405043       | 91905073     | 4           |
| 7         | 10         | 77488338       | 77988368     | 3           |
| 8         | 11         | 20579188       | 23079218     | 3           |
| 9         | 13         | 44442114       | 47942144     | 1           |
| 10        | 8          | 30770905       | 35270935     | 1           |

Table S12. Simulated CNVs for sample s9.

| Region id | Chromosome | Start position | End position | Copy number |
|-----------|------------|----------------|--------------|-------------|
| 1         | 15         | 40505004       | 41005034     | 20          |
| 2         | 16         | 70164886       | 71664916     | 15          |
| 3         | 10         | 70081563       | 72581593     | 7           |
| 4         | 10         | 80638065       | 84138095     | 6           |
| 5         | 7          | 44805290       | 49305320     | 5           |
| 6         | 19         | 15091187       | 15591217     | 4           |
| 7         | 8          | 70701956       | 72201986     | 3           |
| 8         | 2          | 42135893       | 44635923     | 3           |
| 9         | 4          | 41772345       | 45272375     | 1           |
| 10        | 4          | 45762097       | 50262127     | 1           |

Table S13. Simulated CNVs for sample s10.

| Region id | Chromosome | Start position | End position | Copy number |
|-----------|------------|----------------|--------------|-------------|
| 1         | 22         | 20371886       | 20871916     | 20          |
| 2         | 1          | 31199071       | 32699101     | 15          |
| 3         | 1          | 35422562       | 37922592     | 7           |
| 4         | 9          | 21005862       | 24505892     | 6           |
| 5         | 15         | 41981618       | 46481648     | 5           |
| 6         | 6          | 80777171       | 81277201     | 4           |
| 7         | 19         | 15082288       | 16582318     | 3           |
| 8         | 2          | 53751087       | 56251117     | 3           |
| 9         | 2          | 60840703       | 64340733     | 1           |
| 10        | 18         | 31993653       | 36493683     | 1           |

## Reference

1. Dempster, A.P., Laird, N.M. and Rubin, D.B. (1977) Maximum likelihood from incomplete data via the EM algorithm. *Journal of the royal statistical society. Series B (methodological)*, 1-38.
2. Rabiner, L. (1989) A tutorial on hidden Markov models and selected applications in speech recognition. *Proceedings of the IEEE*, 77, 257-286.
3. Li, H., Handsaker, B., Wysoker, A., Fennell, T., Ruan, J., Homer, N., Marth, G., Abecasis, G. and Durbin, R. (2009) The sequence alignment/map format and SAMtools. *Bioinformatics*, 25, 2078-2079.
